# Supplementary material
Source: Elsevier journal article supplement (https://www.sciencedirect.com/science/article/pii/S0300893213003576)
Supplement: mmc1 [file mmc1.pdf]

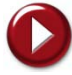

## Material suplementario

---

### **Resultados iniciales de un programa nacional para el seguimiento de dosis de radiación en pacientes de cardiología intervencionista**

Roberto M. Sánchez <sup>a,\*</sup>, Eliseo Vano <sup>a,b</sup>, José M. Fernández <sup>a,b</sup>, Javier Escaned <sup>c</sup>, Javier Goicolea <sup>d</sup> y Xavier Pifarré <sup>e</sup>, en representación del grupo DOCCACI

*<sup>a</sup>Servicio de Física Médica, Hospital Clínico San Carlos, Instituto de Investigación Sanitaria del Hospital Clínico San Carlos, Madrid, España*

*<sup>b</sup>Departamento de Radiología, Facultad de Medicina, Universidad Complutense de Madrid, Madrid, España*

*<sup>c</sup>Servicio de Cardiología, Hospital Clínico San Carlos, Instituto de Investigación Sanitaria del Hospital Clínico San Carlos, Madrid, España*

*<sup>d</sup>Servicio de Cardiología, Hospital Puerta de Hierro, Majadahonda, Madrid, España*

*<sup>e</sup>Servicio de Física Médica, Hospital Puerta de Hierro, Majadahonda, Madrid, España*

---

#### **Profesionales que componen el grupo DOCCACI:**

R. Sánchez, E. Vano, J.M. Fernández y J. Escaned (Hospital Clínico San Carlos, Madrid), X. Pifarré y J. Goicolea (Hospital Puerta de Hierro, Majadahonda, Madrid), J.M. Ordiales y J.M. Nogales (Hospital de Mérida, Badajoz), F. Carrera y J.F. Díaz (Hospital Juan Ramón Jiménez, Huelva), J. Sotil, J.J. Rovira y B. García (Hospital Valle de Hebrón, Barcelona), F. Rosales y J.R. Sáez (Hospital de Basurto, Bilbao), J. Hernández y F. Bosa (Hospital Universitario de Canarias, La Laguna, Tenerife), M.M. Soler y M. Moreno (Hospital Reina Sofía, Córdoba) y M.A. García y A.M. Torres (Hospital Txagorritxu, Vitoria).
